# Supplementary material for: Comparative Analysis of Facial Coloration between Introduced and Source Populations of the Red Wood Ant Formica paralugubris
Source: MDPI journal article supplement (doi:10.3390/insects13121137), 2022-12-09

**Figure S1.** PLSDA projections of relative warps from facial coloration shape of ant workers in each population. Nests are represented by different colors and symbols. Ellipses are 95% C.I. GP = Giovetto di Paline, AA = Avornio Alto; FF = Fosso Fresciaio; BA = Baradello; LC = Le Cullacce; LM = La Lama. GP and BA are the Alpine native populations.

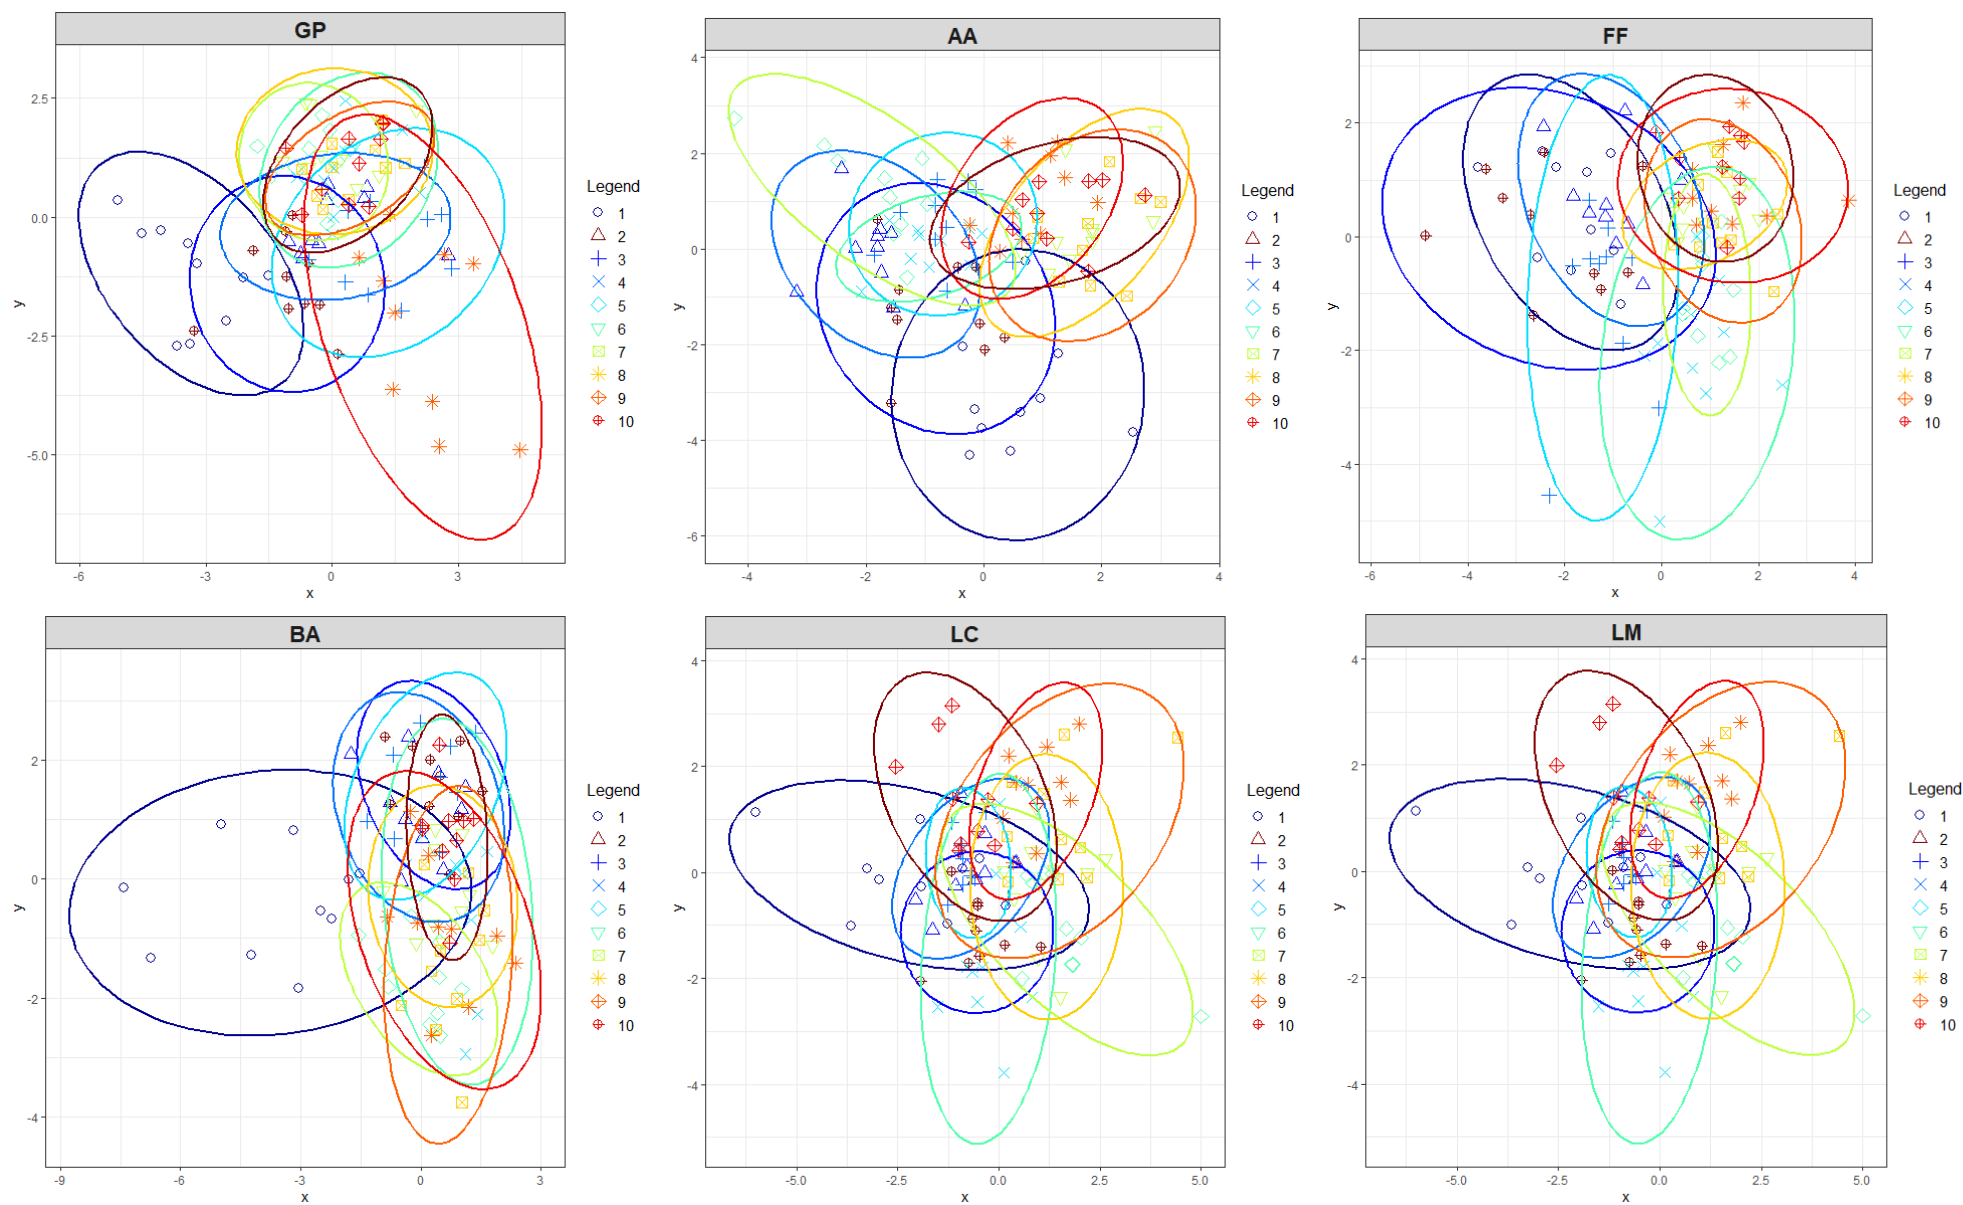

Supplement: s1 [file s1]
